# Supplementary material for: Influence of ferromagnetic connection of Ising-type DyIII-based single ion magnets on their magnetic slow relaxation
Source: Royal Society of Chemistry journal article supplement (doi:10.1039/c3dt50762a), 2013-01-01
Supplement: c3dt50762a.pdf [file c3dt50762a.pdf]

Supplementary information for

**“Influence of Ferromagnetic Connection of Ising-type Dy<sup>III</sup>-based  
Single Ion Magnets on their magnetic slow relaxation”**

*X. Yi, K. Bernot,\* O. Cador J. Luzon, G. Calvez, C. Daiguebonne and O. Guillou*

1. Experimental procedures
2. Additional figures and tables

## 1. Experimental procedures

**Synthesis.** Hexafluoroacetylacetone is reacted with  $\text{DyCl}_3 \cdot 6\text{H}_2\text{O}$  to form  $\text{Dy}(\text{hfac})_3 \cdot 2\text{H}_2\text{O}$ .<sup>[1]</sup> 0.1 mmol of this precursor is then dissolved in boiling hexane (20 mL). After stirring for 2 hours, 4-styrylpyridine (0.1 mmol) in hexane (20 mL) is added and refluxed for 30 minutes. Then the solution is cooled to 4°C for slow evaporation and gives colourless crystals (**1**) suitable for single crystal X-ray analysis. Elemental analysis calcd (%) for **1**; C: 34.22, H: 1.64, N: 1.42; found: C 34.12, H 1.57, N 1.39.

**Crystal Structure Determination.** Single crystal was mounted on a APEXII AXS-Bruker diffractometer equipped with a CCD camera and a graphite-monochromated  $\text{MoK}\alpha$  radiation source ( $\lambda=0.71073 \text{ \AA}$ ), from the Centre de Diffractométrie (CDIFX), Université de Rennes 1, France. Data were collected at 150K. Structure was solved with a direct method using the SIR-97 program<sup>[2]</sup> and refined with a full-matrix least-squares method on  $F^2$  using the SHELXL-97 program<sup>[3]</sup> and WinGx interface.<sup>[4]</sup> Crystallographic data are summarized in Table 1. CCDC-893273 contains the supplementary crystallographic data for this paper. These data can be obtained free of charge from The Cambridge Crystallographic Data Centre via [www.ccdc.cam.ac.uk/data\\_request/cif](http://www.ccdc.cam.ac.uk/data_request/cif).

**X-ray Powder Diffraction.** Diagrams have been collected using a Panalytical X'Pert Pro diffractometer with an X'Celerator detector. The typical recording conditions were 45kV, 40mA for  $\text{Cu-K}\alpha$  ( $\lambda=1.542 \text{ \AA}$ ), the diagrams were recorded in  $\theta$ - $\theta$  mode in 60 min between 5° and 75° (8378 measurements) with a step size of 0.0084° and a scan time of 50s. The calculated patterns were produced using the Powdercell and WinPLOTR software programs.<sup>[5]</sup>

**Scanning Electron Microscopy (SEM) and Energy Dispersive Spectroscopy (EDS) analysis** All measurements were carried out with a Hitachi TM-1000, Tabletop Microscope version 02.11 (Hitachi High-Technologies, Corporation Tokyo Japan) with EDS analysis system (SwiftED-TM, Oxford Instruments Link INCA). The detector type is a Silicon drift detector, with an energy resolution of 165eV which allows us to detect the element from Na to U. With the software SwiftED-TM, qualitative and quantitative analyses can be realized. All the samples have been observed by means of an electron beam accelerated at 15kV, under high vacuum. The samples were assembled on carbon discs, stuck on an aluminium stub fixed at 7mm from EDX beam, with an angle of measurement of 22°.

**Magnetic dc and ac Measurements.** Bulk measurements were performed on polycrystalline sample embedded in grease to avoid in-field orientation of the crystallites. A Quantum Design MPMS magnetometer has been used. Measurements were corrected for the diamagnetic contribution, as calculated with Pascal's constants, and for the diamagnetism of the sample holder, as independently determined. Single crystal measurements were performed on the same magnetometer equipped with a horizontal rotating sample holder. After indexation of the crystal faces by single crystal diffraction, the angular dependence of the magnetization has been measured in three orthogonal planes ( $ab'$ ,  $b'c'$  and  $ac'$ ) at 2 K with a 1 kOe magnetic field.  $c'$  vector is collinear to (011) direction. The data were then fitted assuming that  $M = \chi H$ . Rotation of  $H$  in  $\alpha\beta$  plane turns the expression of the magnetization to  $M/H = \chi_{\alpha\alpha}(\cos \theta)^2 + \chi_{\beta\beta}(\sin \theta)^2 + \chi_{\alpha\beta}(\sin \theta \cos \theta)$  where  $\alpha$  and  $\beta$  are the directions of the vectors  $a$ ,  $b'$  and  $c'$  in a cyclic permutation and  $\theta$  is the angle between  $H$  and  $\alpha$  direction.

## 2. Additional figures and tables

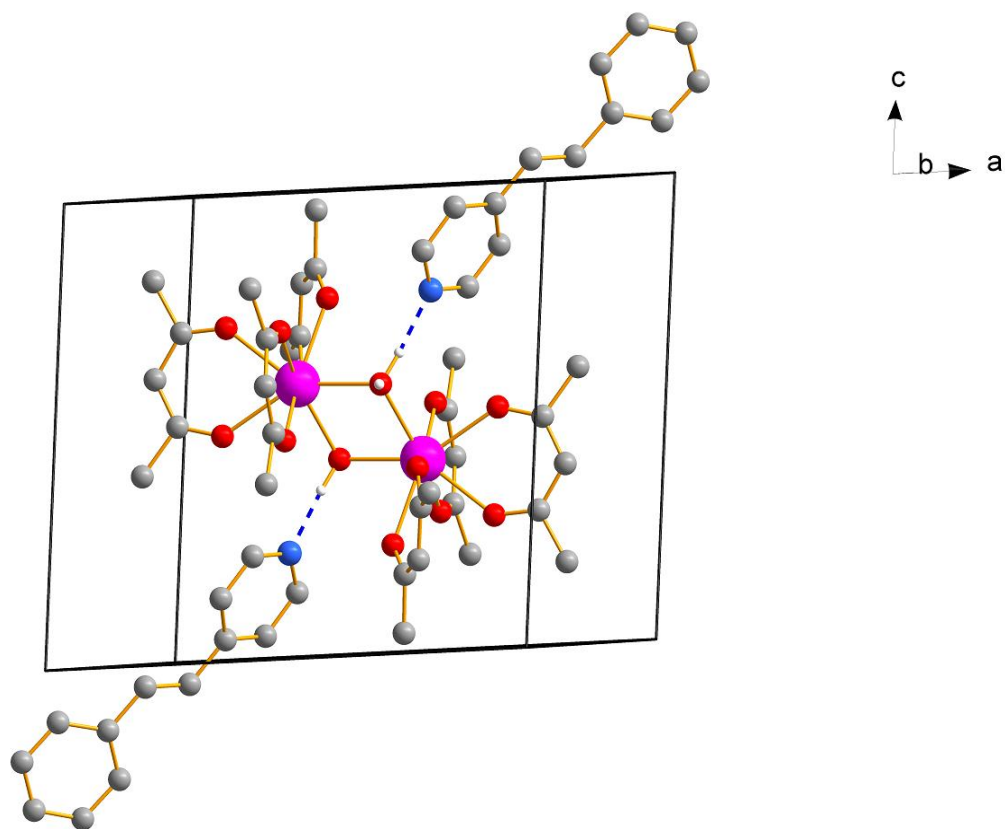

**Figure S1:** View of **1** highlighting the weak N-H bonds. Hydrogen and fluorine atoms are omitted for clarity.

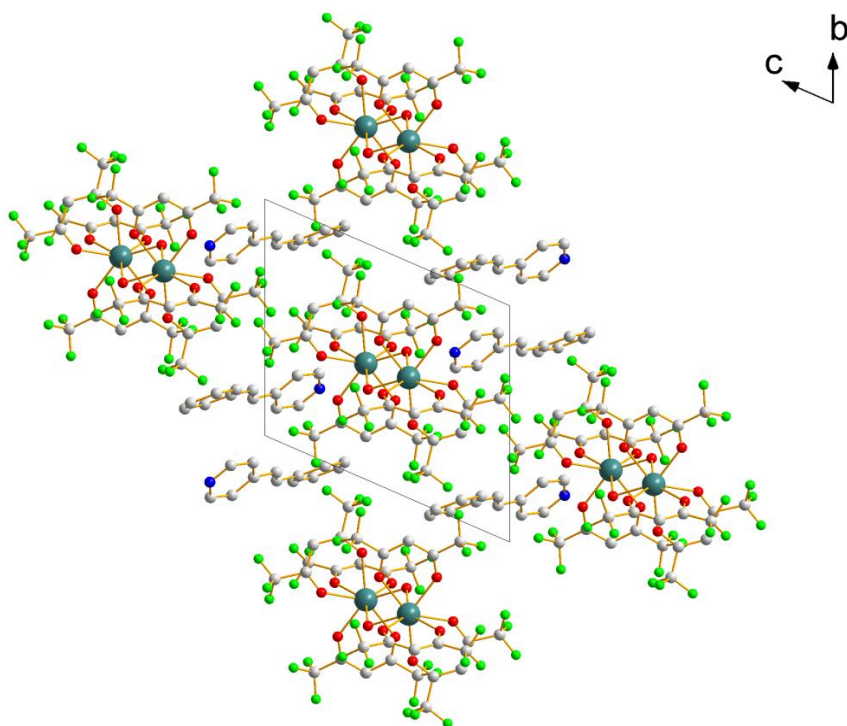

**Figure S2:** View of the crystal packing of  $[\text{Dy}(\text{hfac})_3\text{H}_2\text{O}]_2$  along a axis. Hydrogen atoms are omitted for clarity.

**Table S1:** Main crystallographic parameters for **1**

|                                                   |                                                                     |
|---------------------------------------------------|---------------------------------------------------------------------|
| Formula                                           | C <sub>28</sub> H <sub>16</sub> F <sub>18</sub> O <sub>7</sub> N Dy |
| M (g.mol <sup>-1</sup> )                          | 982.92 g.mol <sup>-1</sup>                                          |
| Crystal system                                    | triclinic                                                           |
| Space group                                       | P-1 (N°2)                                                           |
| a(Å)                                              | 12.69(4)                                                            |
| b(Å)                                              | 12.79(0)                                                            |
| c(Å)                                              | 13.04(7)                                                            |
| α(°)                                              | 64.79                                                               |
| β(°)                                              | 81.14                                                               |
| γ(°)                                              | 64.31                                                               |
| V(Å <sup>3</sup> )                                | 1725.9(0)                                                           |
| Z                                                 | 2                                                                   |
| T(K)                                              | 150(2)                                                              |
| 2θ range (°)                                      | 4.06-54.90                                                          |
| Reflns collected                                  | 21264                                                               |
| Independent                                       | 7840                                                                |
| Observed reflns                                   | 6453                                                                |
| Parameters                                        | 496                                                                 |
| R <sub>int</sub> /R <sub>1</sub> /ωR <sup>2</sup> | 0.0351/0.0340/0.093                                                 |
| Goof                                              | 1.092                                                               |

**Table S2:** Selected planes angles, bond and distances.

| Planes<br>(numbered by<br>their oxygen<br>atoms) | Angle (°) | Bond    | Distance<br>(Å) | Atoms      | Angle (°) |
|--------------------------------------------------|-----------|---------|-----------------|------------|-----------|
| 727b-217b                                        | 13.32 (4) | Dy1-Dy1 | 3.78(1)         | O2-Dy1-O1  | 71.55(3)  |
| 354-546                                          | 6.22 (9)  | Dy1-O3  | 2.38 (2)        | O7-Dy1-O7b | 72.12(8)  |
| 752-523                                          | 54.22 (1) | Dy1-O6  | 2.40(8)         | O2-Dy1-O7  | 77.27(8)  |
| 523-231                                          | 53.95 (1) | Dy1-O7  | 2.33(9)         | O7b-Dy1-O1 | 73.32(9)  |
| 213-134                                          | 49.92 (5) | Dy1-O4  | 2.39(8)         | O3-Dy1-O4  | 70.21(3)  |
| 314-147b                                         | 47.57 (9) | Dy1-O2  | 2.36(9)         | O4-Dy1-O6  | 73.06(4)  |
| 147b-647b                                        | 52.49 (8) | Dy1-O1  | 2.37(5)         | O6-Dy1-O5  | 70.94(1)  |
| 476-767                                          | 52.21 (5) | Dy1-O5  | 2.36(1)         | O5-Dy1-O3  | 72.01(1)  |
| 767b-765                                         | 53.30 (5) |         |                 | O7b-Dy1-O6 | 80.60 (6) |
| 657-572                                          | 46.84 (6) |         |                 | O7-Dy1-O6  | 79.78(6)  |
|                                                  |           |         |                 | O3-Dy1-O1  | 77.25(1)  |
|                                                  |           |         |                 | O4-Dy1-O1  | 84.68(2)  |

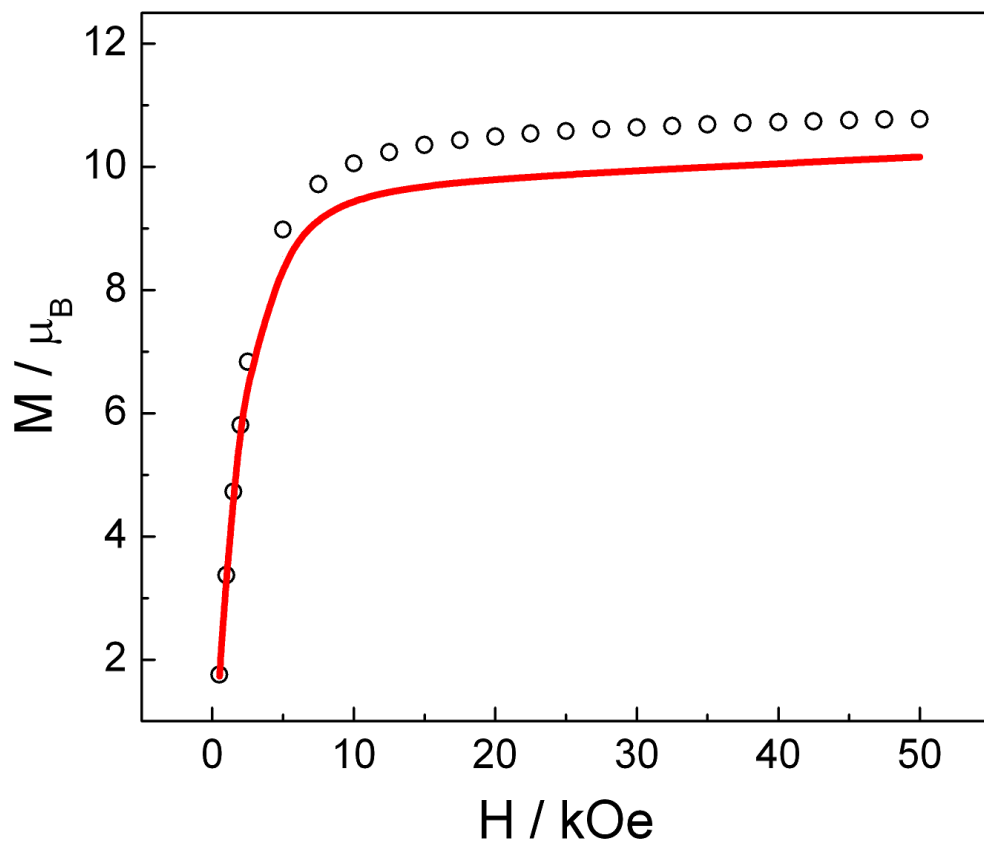

**Figure S3:** Field dependence of the magnetization measured on **1** with best fit.

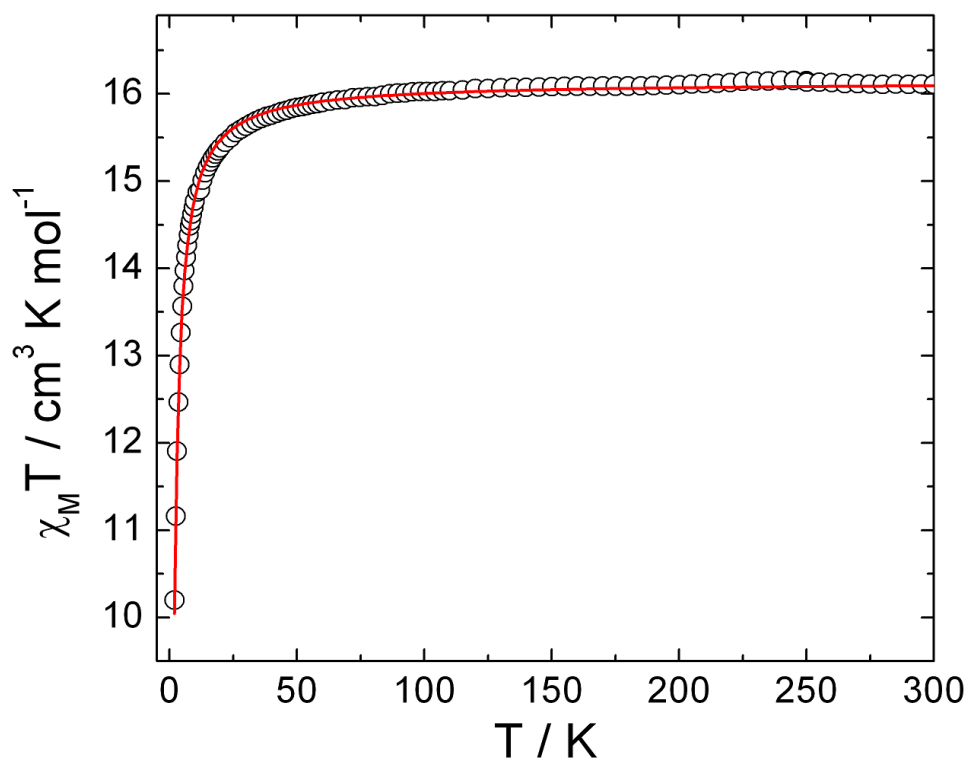

**Figure S5:** Temperature dependence of  $\chi_M T$  for **3** with best fit as solid line.

### Estimation of the dipolar contribution to the magnetic coupling constant.

The dipolar magnetic interaction between two magnetic moments can be written as:

$$H = -\frac{\mu_0}{4\pi r^3} (3(\vec{m}_1 \cdot \hat{r})(\vec{m}_2 \cdot \hat{r}) - \vec{m}_1 \cdot \vec{m}_2)$$

For a trivalent lanthanide ion:  $\vec{m} = g_J \beta \vec{J}$ . So,

$$H = -\frac{\mu_0 (g_J \beta)^2}{4\pi r^3} (3(\vec{J}_1 \cdot \hat{r})(\vec{J}_2 \cdot \hat{r}) - \vec{J}_1 \cdot \vec{J}_2)$$

In the Dy dimer, **1**, considering only the ground doublet state in which both easy anisotropy axes are parallel, the interaction can be written as:

$$H = -\frac{\mu_0 (g_J \beta)^2}{4\pi r^3} (3\cos^2 \theta - 1) J_{z1} \cdot J_{z2} = -A (3\cos^2 \theta - 1) J_{z1} \cdot J_{z2}$$

$\frac{\mu_0}{4\pi}$  is an adimensional constant:  $10^{-7}$

$\beta$  is the Bohr magneton:  $9.27400915(23) \times 10^{-24}$  J/T.

For the ground state multiplet of the Dy(III) ion:  $g_J = 4/3$ .

Replacing the different values the value of A in the previous expression is  $0,01424 \text{ cm}^{-1}$  (for  $r = 3,78 \text{ \AA}$ ). Then, the contribution of the dipolar interaction to the magnetic coupling constant should be:

$$J_{dip} = A (3\cos^2 \theta - 1)$$

For  $\theta = 51.2^\circ$ ,  $J_{dip} = 0.0025 \text{ cm}^{-1}$ , value much lower than the value obtained from the fit:  $J = 0.01005 \text{ cm}^{-1}$ .

For the Gd derivative, **3**, since in Gd(III)  $\vec{J} = \vec{S}$ , the maximum antiferromagnetic contribution to the antiferromagnetic coupling constant is:  $J_{dip} = -0,01424 \text{ cm}^{-1}$  (when the magnetic moments are collinear and  $\theta = 90^\circ$ ).



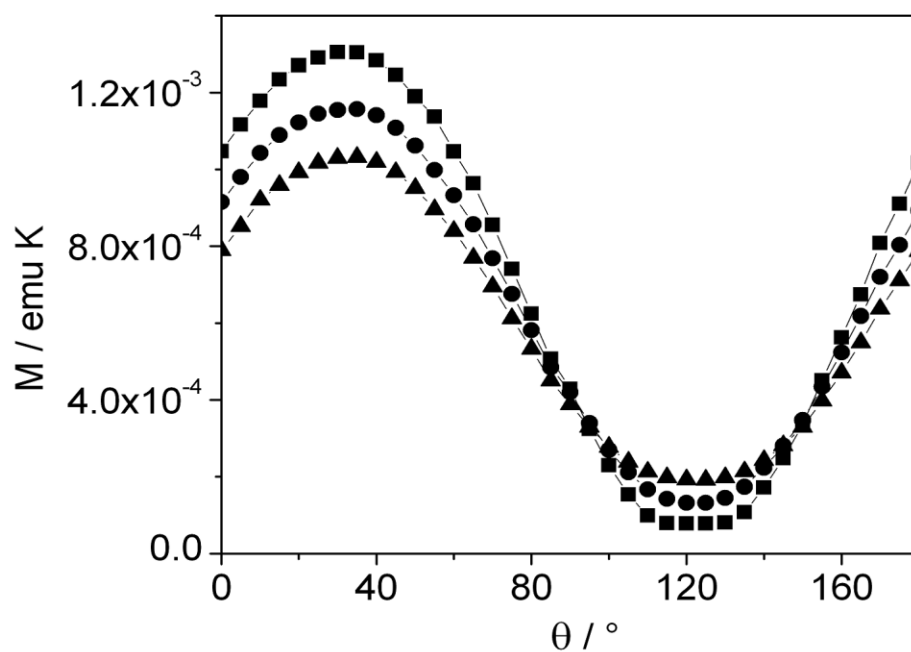

**Figure S6:** Angular dependence of  $M$  measured in the  $ac'$  plane of single crystal of **1** recorded at 2 (squares), 5 (circles) and 10 K (triangles).

Susceptibility tensor in the  $ab'c'$  frame for compound **1**.

$$\chi_M = \begin{pmatrix} 34.4273 & 3.2491 & -14.3006 \\ 3.2491 & 2.1915 & 1.6354 \\ -14.3006 & 1.6354 & 8.4561 \end{pmatrix} emu mol^{-1}$$

Principal values and direction of the susceptibility tensor in the  $ab'c'$  frame:

$$\chi_{xx} \begin{pmatrix} 0.224 \\ 0.702 \\ 0.676 \end{pmatrix} = 5.42, \chi_{yy} \begin{pmatrix} 0.297 \\ 0.710 \\ -0.638 \end{pmatrix} = -0.02, \chi_{zz} \begin{pmatrix} -0.928 \\ -0.058 \\ 0.368 \end{pmatrix} = 44.29 emu mol^{-1}$$

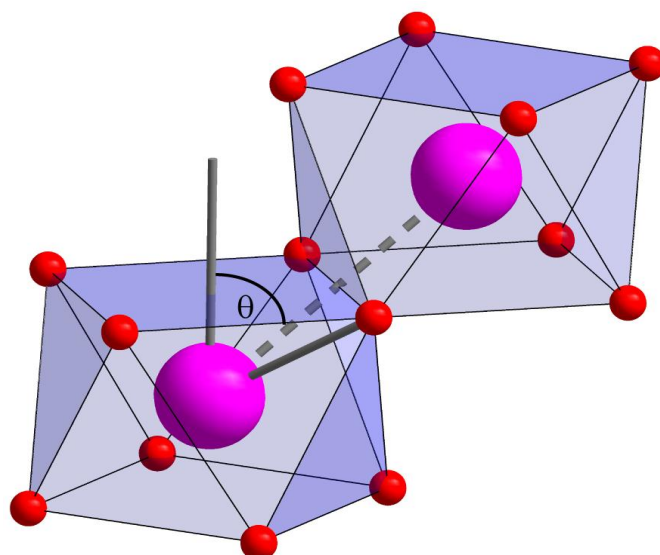

**Figure S7:** Schematic representation of a centrosymmetrical dimer of ideal SAP sharing an edge of the square face. It is relatively easy to demonstrate that in the hard sphere model the angle ( $\theta$ ) between  $C_4$  axis and metal-metal direction is expressed by  $\sin\theta = 2/\sqrt{7-(\sqrt{2}-1)^2}$  and  $\theta=49.94^\circ$ .

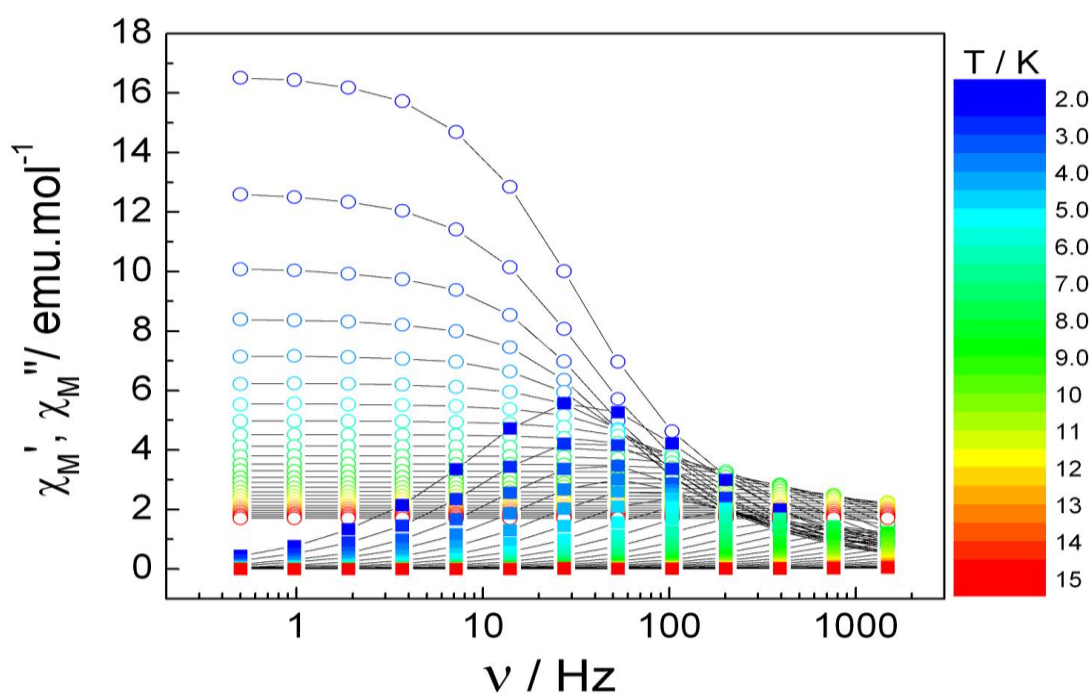

**Figure S8:** Frequency dependence of  $\chi_M'$  and  $\chi_M''$  for **1** measured with 0 Oe external dc field. Colour mapping ranges from 2 (blue) to 15 K (red). Lines are guides to the eye.

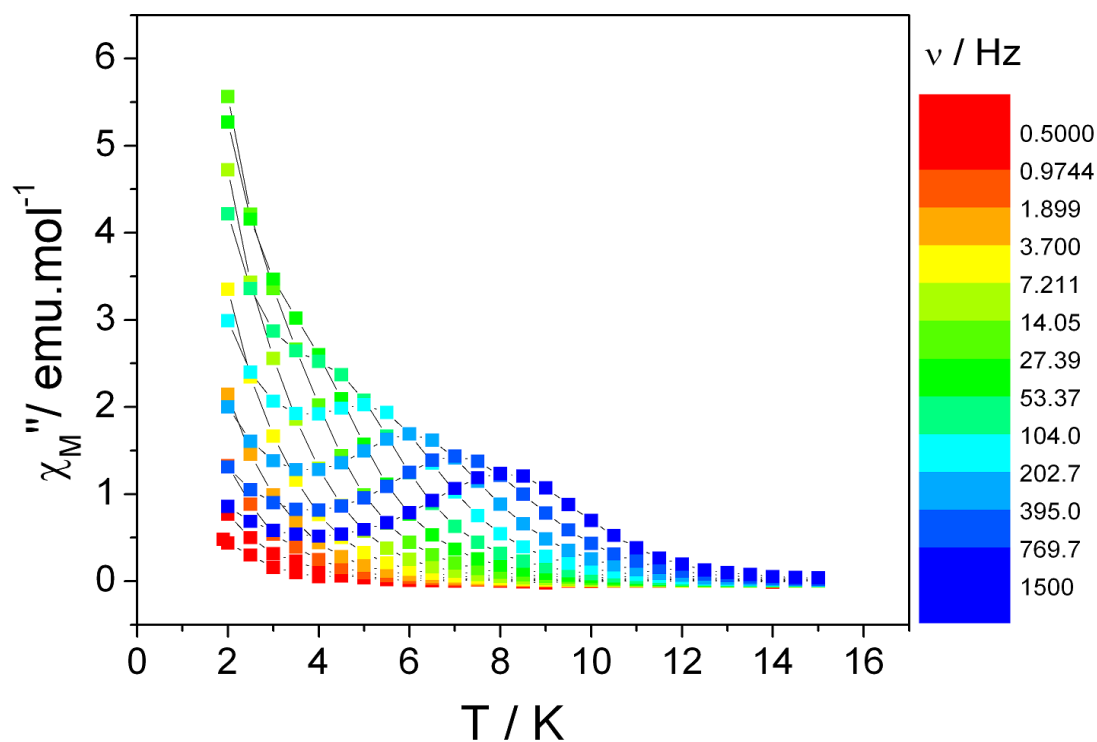

**Figure S9:** Temperature dependence of  $\chi_M''$  for **1** measured with 0 Oe external dc field. Colour mapping ranges from 0.5 (red) to 1500 Hz (blue). Lines are guides to the eye.

**Table S3:** Table of  $\tau$  extracted values from the fitting of  $X''$  vs frequency curves for **1** in 0 Oe dc field.

| T(K) | $\tau$ ( $\mu$ s) | T(K) | $\tau$ ( $\mu$ s) | T(K) | $\tau$ ( $\mu$ s) |
|------|-------------------|------|-------------------|------|-------------------|
| 2    | 4583              | 5    | 1136              | 8    | 142               |
| 2.5  | 4086              | 5.5  | 803               | 8.5  | 97                |
| 3    | 3522              | 6    | 564               | 9    | 67                |
| 3.5  | 2866              | 6.5  | 397               | 9.5  | 48                |
| 4    | 2182              | 7    | 282               | 10   | 27                |
| 4.5  | 1593              | 7.5  | 143               | 10.5 | 19                |

**Table S4:** table of extracted values from the Argand plot of **1** with a 0 Oe external field before normalization.

| T (K) | $\chi_s$              | $\chi_T$              | $\alpha$              | $\chi^2 (\times 10^{-5})$ |
|-------|-----------------------|-----------------------|-----------------------|---------------------------|
| 2     | 1.200 ( $\pm 0.011$ ) | 16.74 ( $\pm 0.003$ ) | 0.207 ( $\pm 0.008$ ) | 1372                      |
| 2.5   | 1.010 ( $\pm 0.008$ ) | 12.71 ( $\pm 0.001$ ) | 0.196 ( $\pm 0.007$ ) | 691                       |
| 3     | 0.891 ( $\pm 0.012$ ) | 10.14 ( $\pm 0.007$ ) | 0.173 ( $\pm 0.004$ ) | 816                       |
| 3.5   | 0.793 ( $\pm 0.008$ ) | 8.430 ( $\pm 0.002$ ) | 0.150 ( $\pm 0.002$ ) | 465                       |
| 4     | 0.722 ( $\pm 0.009$ ) | 7.180 ( $\pm 0.007$ ) | 0.124 ( $\pm 0.003$ ) | 483                       |
| 4.5   | 0.661 ( $\pm 0.007$ ) | 6.250 ( $\pm 0.002$ ) | 0.107 ( $\pm 0.007$ ) | 151                       |
| 5     | 0.602 ( $\pm 0.006$ ) | 5.553 ( $\pm 0.001$ ) | 0.103 ( $\pm 0.002$ ) | 242                       |
| 5.5   | 0.508 ( $\pm 0.001$ ) | 4.977 ( $\pm 0.003$ ) | 0.084 ( $\pm 0.001$ ) | 14                        |
| 6     | 0.530 ( $\pm 0.005$ ) | 4.518 ( $\pm 0.008$ ) | 0.086 ( $\pm 0.004$ ) | 32                        |
| 6.5   | 0.494 ( $\pm 0.004$ ) | 4.131 ( $\pm 0.008$ ) | 0.081 ( $\pm 0.001$ ) | 82                        |
| 7     | 0.440 ( $\pm 0.002$ ) | 3.809 ( $\pm 0.009$ ) | 0.087 ( $\pm 0.001$ ) | 79                        |
| 7.5   | 0.376 ( $\pm 0.001$ ) | 3.533 ( $\pm 0.001$ ) | 0.093 ( $\pm 0.008$ ) | 78                        |
| 8     | 0.357 ( $\pm 0.002$ ) | 3.295 ( $\pm 0.002$ ) | 0.091 ( $\pm 0.006$ ) | 10                        |
| 8.5   | 0.239 ( $\pm 0.003$ ) | 3.087 ( $\pm 0.006$ ) | 0.101 ( $\pm 0.003$ ) | 19                        |
| 9     | 0.080 ( $\pm 0.002$ ) | 2.910 ( $\pm 0.007$ ) | 0.130 ( $\pm 0.002$ ) | 68                        |
| 9.5   | 0.083 ( $\pm 0.007$ ) | 2.751 ( $\pm 0.002$ ) | 0.180 ( $\pm 0.004$ ) | 188                       |
| 10    | 0.032 ( $\pm 0.009$ ) | 2.600 ( $\pm 0.002$ ) | 0.142 ( $\pm 0.006$ ) | 16                        |

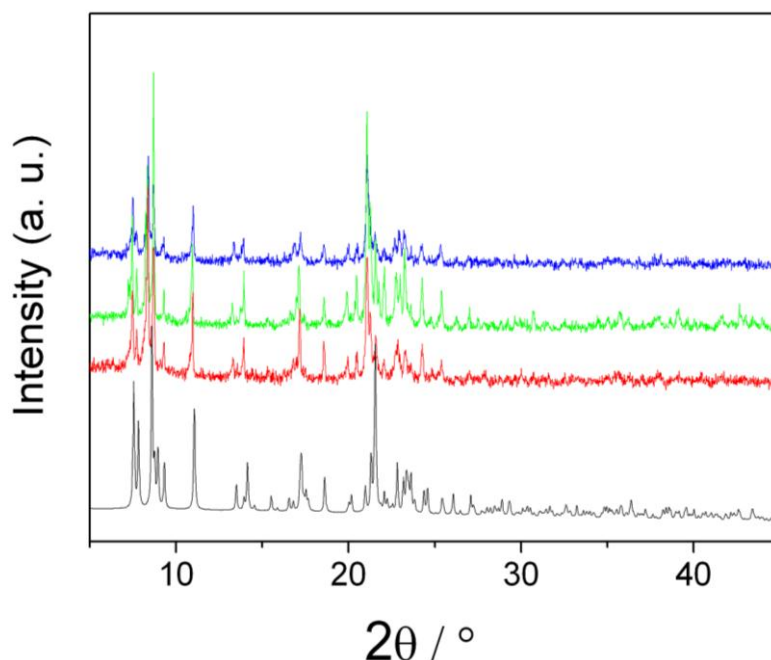

**Figure S4:** X-Ray powder pattern of **1** simulated from cif file at 150 K (bottom) and **1**, **2** and **3** as powders (from bottom to top) recorded at room temperature.

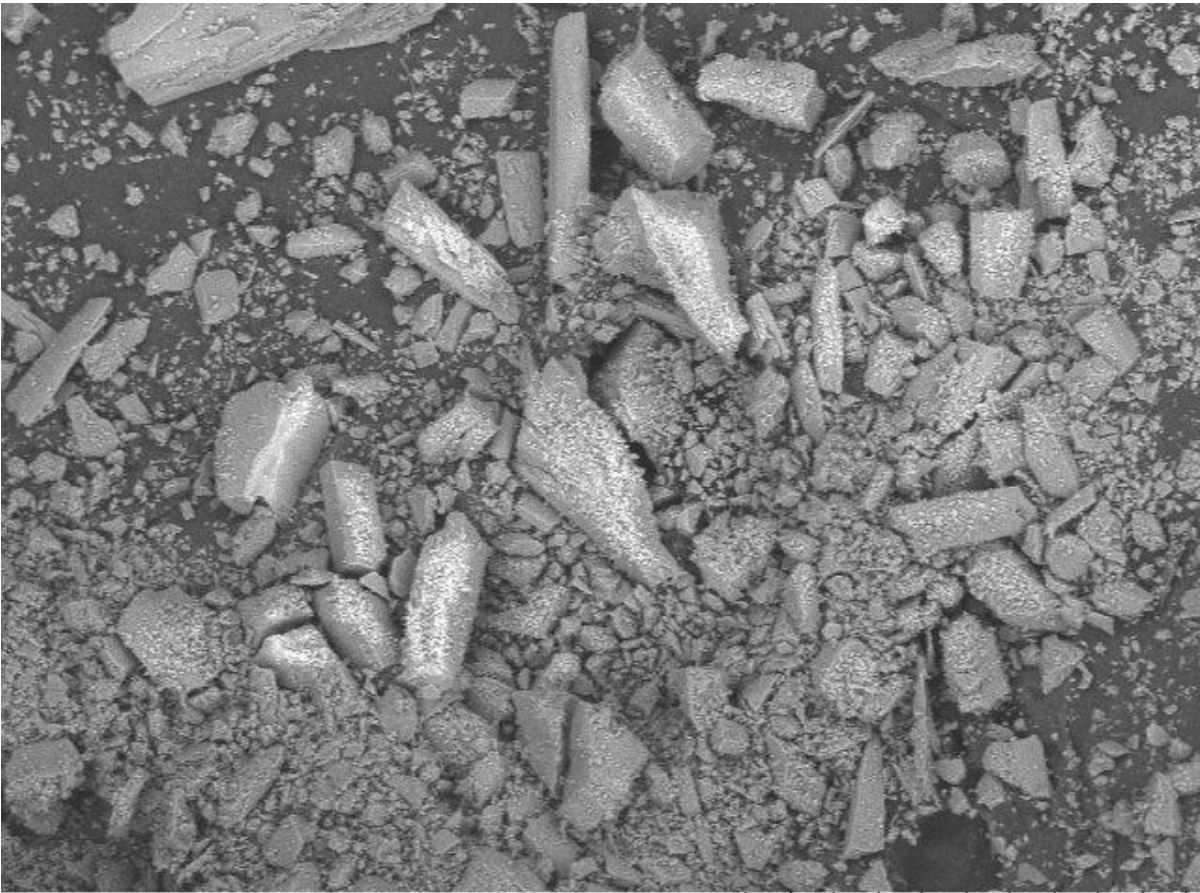

Dy20Y800001      2012/04/04      D5.3 x250 300 μm  
stilbene

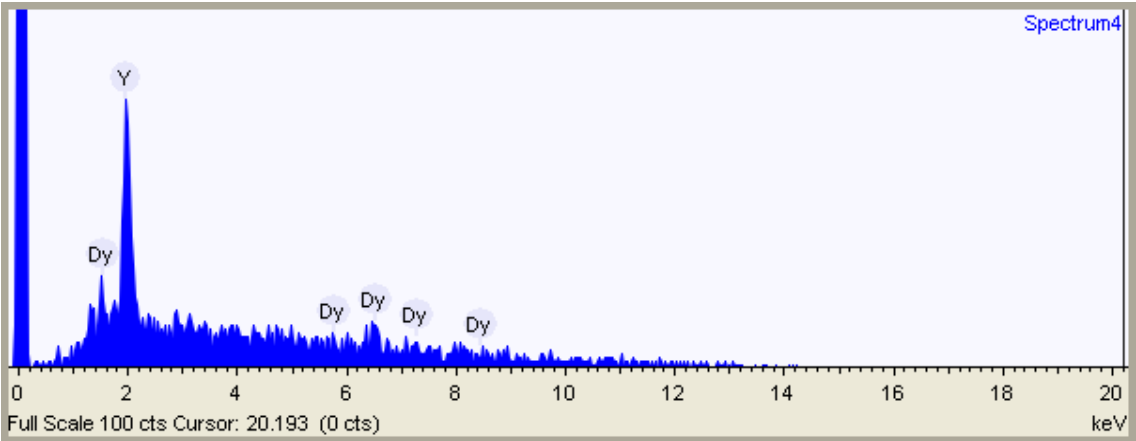

| Element    | Weight % | atomic |
|------------|----------|--------|
| Yttrium    | 65.7     | 77.8   |
| Dysprosium | 34.3     | 22.2   |

**Figure S10:** SEM images and EDS analysis of the doped sample **2**.

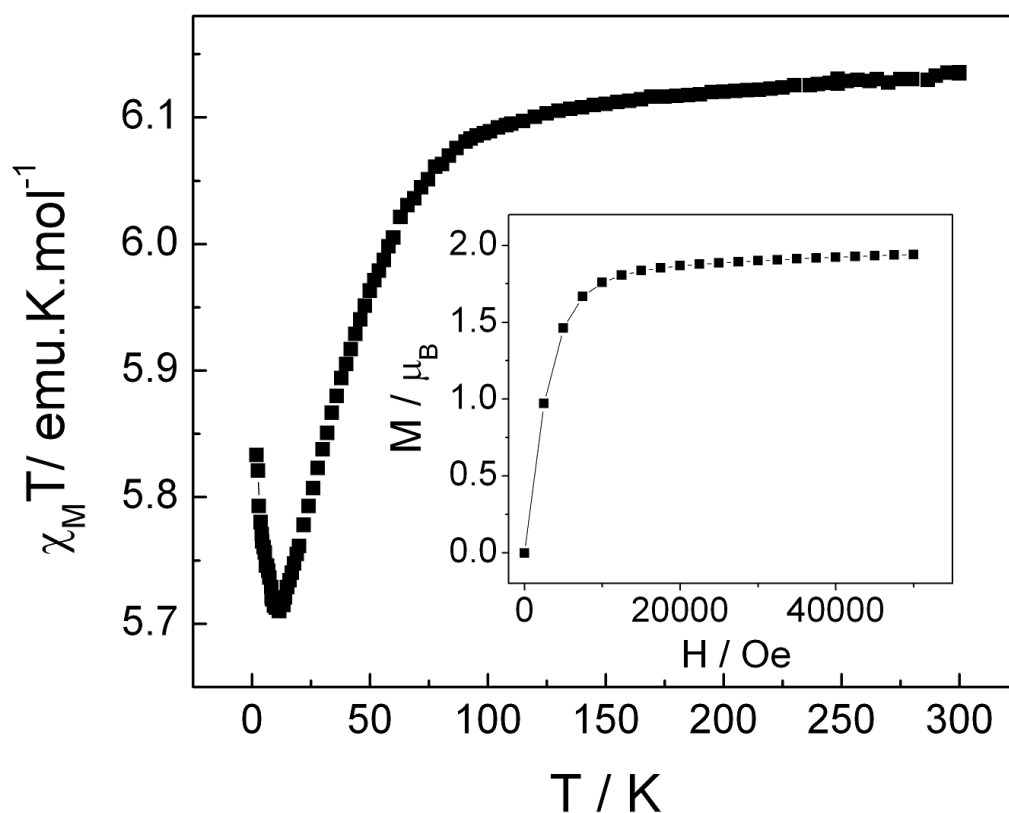

**Figure S11:** Temperature dependence of  $\chi_M T$  for **2**. In inset, field dependence of the magnetization.

The room temperature  $\chi_M T_{(RT)}$  value for **2** is 6.13 emu K mol<sup>-1</sup> in agreement with the measured doping ratio (Y<sub>77.5</sub>Dy<sub>22.5</sub>) that gives a theoretical  $\chi_M T_{(RT)}$  of 6.36 emu.K.mol<sup>-1</sup>. As for **1**  $\chi_M T$  decreases on lowering the temperature, reaches a minimum at 12 K (5.71 emu K mol<sup>-1</sup>) and then increase at lowest temperature. This last increase is very weak (5.83 emu K mol<sup>-1</sup> at 2K) and evidences that very few Dy-Dy pairs are present in the sample and that main magnetic entities in **2** are then Dy<sup>III</sup>-Y<sup>III</sup> dimers.

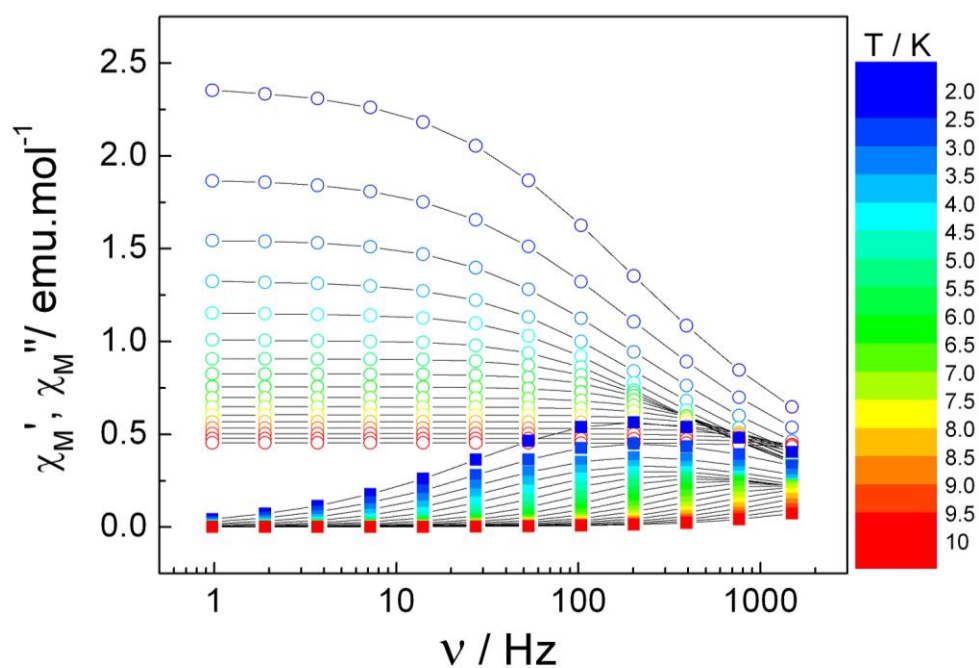

**Figure S12:** Frequency dependence of  $\chi_M'$  and  $\chi_M''$  for **2** measured with 0 Oe external dc field. Colour mapping ranges from 2 (blue) to 15 K (red). Lines are guides to the eye.

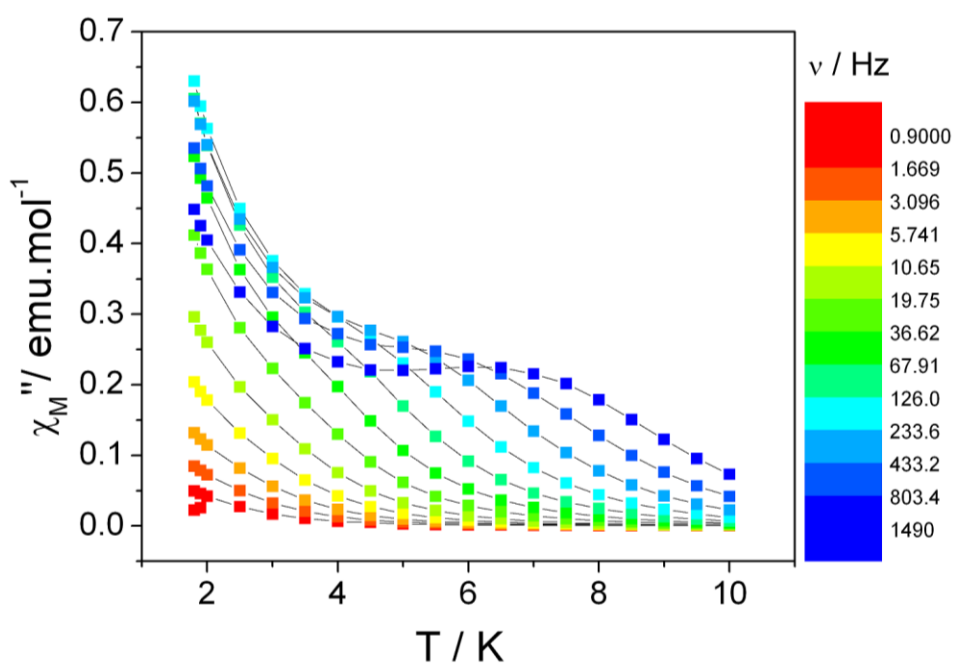

**Figure S13:** Temperature dependence of  $\chi_M''$  for **2** measured with 0 Oe external dc field. Colour mapping ranges from 0.9 (red) to 1500 Hz (blue). Lines are guides to the eye.



**Table S5:** Table of  $\tau$  extracted values from the fitting of  $X''$  vs frequency curves for **2** in 0 Oe dc field.

| T(K) | $\tau$ ( $\mu$ s) | T(K) | $\tau$ ( $\mu$ s) | T(K) | $\tau$ ( $\mu$ s) |
|------|-------------------|------|-------------------|------|-------------------|
| 2    | 738.2             | 5    | 307               | 8    | 69                |
| 2.5  | 683               | 5.5  | 235               | 8.5  | 55                |
| 3    | 615               | 6    | 176               | 9    | 43                |
| 3.5  | 572               | 6.5  | 135               | 9.5  | 26                |
| 4    | 484               | 7    | 111               | 10   | 19                |
| 4.5  | 399               | 7.5  | 85                |      |                   |

**Table S6:** table of extracted values from the Argand plot of **2** with a 0 Oe external field before normalization.

| T (K) | $\chi_s$               | $\chi_\tau$           | $\alpha$              | $\chi^2 (\times 10^{-5})$ |
|-------|------------------------|-----------------------|-----------------------|---------------------------|
| 2     | 0.247 ( $\pm 0.020$ )  | 2.393 ( $\pm 0.007$ ) | 0.370 ( $\pm 0.004$ ) | 190                       |
| 2.5   | 0.223 ( $\pm 0.015$ )  | 1.897 ( $\pm 0.005$ ) | 0.354 ( $\pm 0.001$ ) | 220                       |
| 3     | 0.212 ( $\pm 0.012$ )  | 1.566 ( $\pm 0.005$ ) | 0.330 ( $\pm 0.009$ ) | 240                       |
| 3.5   | 0.207 ( $\pm 0.003$ )  | 1.335 ( $\pm 0.001$ ) | 0.299 ( $\pm 0.009$ ) | 170                       |
| 4     | 0.210 ( $\pm 0.002$ )  | 1.160 ( $\pm 0.007$ ) | 0.250 ( $\pm 0.008$ ) | 180                       |
| 4.5   | 0.219 ( $\pm 0.005$ )  | 1.011 ( $\pm 0.004$ ) | 0.177 ( $\pm 0.007$ ) | 140                       |
| 5     | 0.207 ( $\pm 0.001$ )  | 0.910 ( $\pm 0.004$ ) | 0.150 ( $\pm 0.001$ ) | 120                       |
| 5.5   | 0.196 ( $\pm 0.008$ )  | 0.826 ( $\pm 0.003$ ) | 0.122 ( $\pm 0.001$ ) | 60                        |
| 6     | 0.188 ( $\pm 0.002$ )  | 0.756 ( $\pm 0.009$ ) | 0.098 ( $\pm 0.002$ ) | 40                        |
| 6.5   | 0.179 ( $\pm 0.001$ )  | 0.698 ( $\pm 0.005$ ) | 0.083 ( $\pm 0.001$ ) | 20                        |
| 7     | 0.174 ( $\pm 0.002$ )  | 0.648 ( $\pm 0.001$ ) | 0.068 ( $\pm 0.004$ ) | 10                        |
| 7.5   | 0.139 ( $\pm 0.0007$ ) | 0.605 ( $\pm 0.002$ ) | 0.079 ( $\pm 0.005$ ) | 40                        |
| 8     | 0.137 ( $\pm 0.0001$ ) | 0.567 ( $\pm 0.002$ ) | 0.061 ( $\pm 0.004$ ) | 0.7                       |
| 8.5   | 0.132 ( $\pm 0.0007$ ) | 0.533 ( $\pm 0.001$ ) | 0.055 ( $\pm 0.002$ ) | 0.6                       |
| 9     | 0.122 ( $\pm 0.0001$ ) | 0.503 ( $\pm 0.009$ ) | 0.050 ( $\pm 0.003$ ) | 0.3                       |
| 9.5   | 0.119 ( $\pm 0.008$ )  | 0.477 ( $\pm 0.003$ ) | 0.043 ( $\pm 0.002$ ) | 0.1                       |
| 10    | 0.105 ( $\pm 0.090$ )  | 0.453 ( $\pm 0.002$ ) | 0.041 ( $\pm 0.001$ ) | 0.5                       |



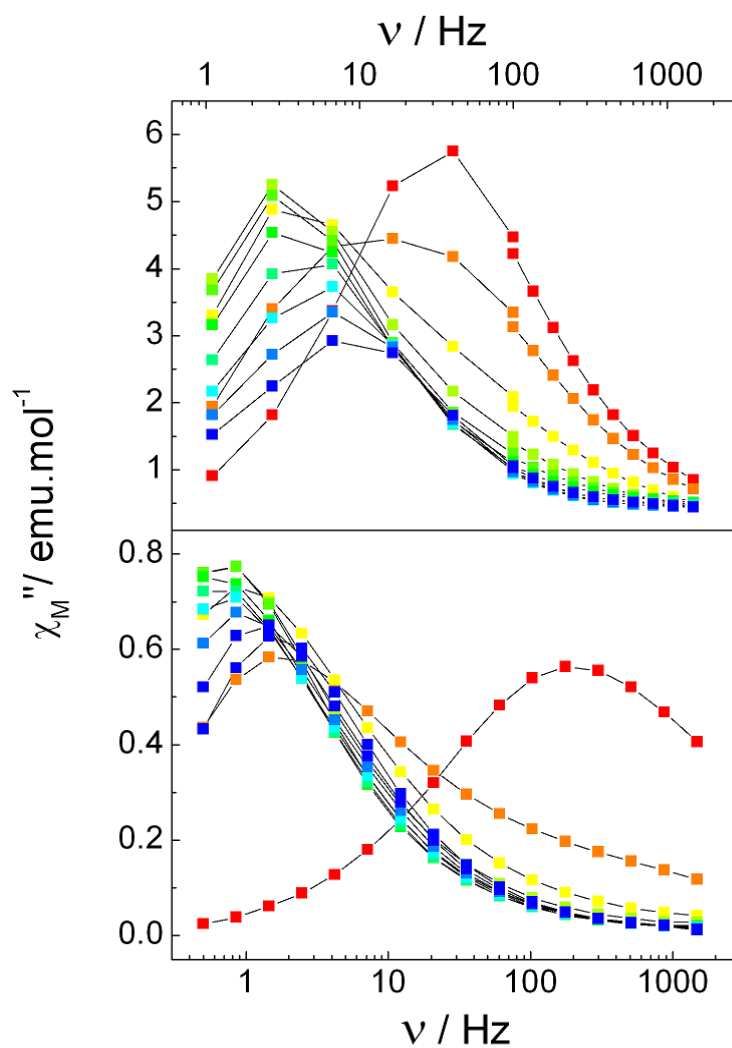

**Figure S14:** Field dependence of  $\chi_M''$  for **1** (top) and **2** (bottom) at 2K. Colour mapping from 0 (red) to 2000 Oe (blue). Lines are guides to the eye.

**Table S7:** Table of  $\tau$  extracted values at 2K from the fitting of  $X''$  vs frequency curves for **1**. Dc external field varying from 0 to 2800 Oe

| H (Oe) | $\tau$ ( $\mu$ s) for <b>1</b> | $\tau$ ( $\mu$ s) for <b>2</b> |
|--------|--------------------------------|--------------------------------|
| 0      | 705                            | 11831                          |
| 200    | 79927                          | 33603                          |
| 400    | 161565                         | 95238                          |
| 600    | 218450                         | 115073                         |
| 800    | 249020                         | 113000                         |
| 1000   | 268641                         | 92093                          |
| 1200   | 253214                         | 70845                          |
| 1400   | 215484                         | 55766                          |
| 1600   | 165164                         | 42760                          |
| 1800   | 120758                         | 46065                          |
| 2000   | 96988                          | 52574                          |
| 2200   | 77588                          | 62892                          |
| 2400   | 62318                          | 74944                          |
| 2600   | 46406                          | 81946                          |
| 2800   | 36164                          | 86986                          |

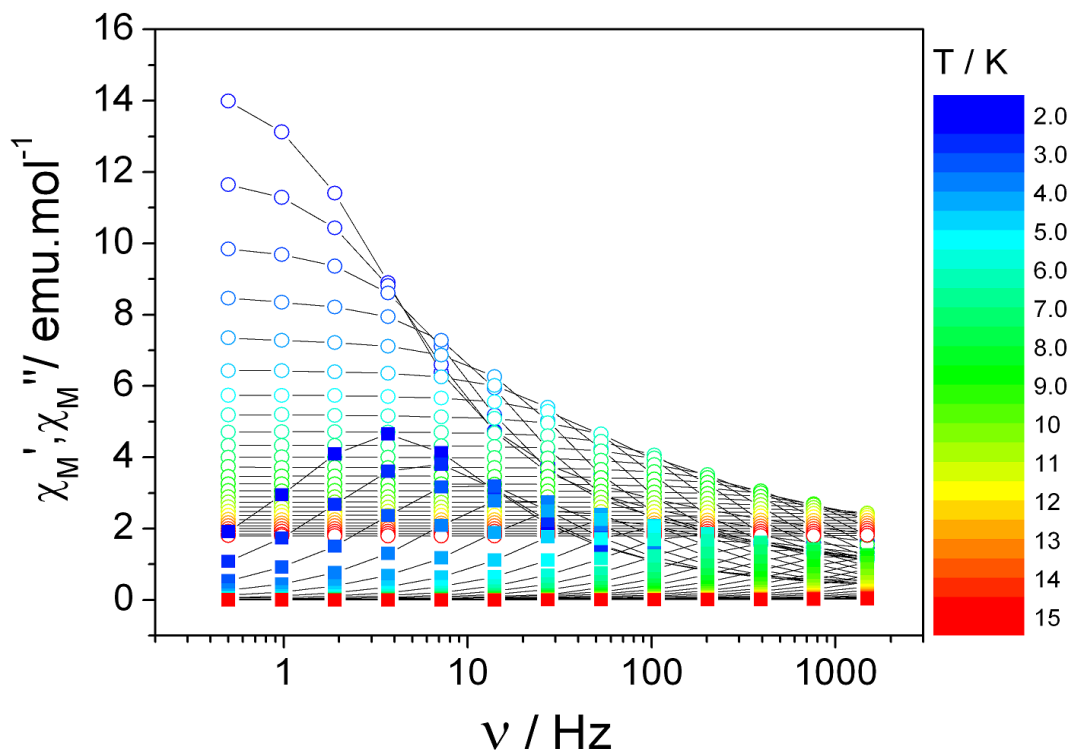

**Figure S15:** Frequency dependence of  $\chi_M'$  and  $\chi_M''$  for **1** measured with 1000 Oe external dc field. Colour mapping ranges from 2 (blue) to 15 K (red). Lines are guides to the eye.

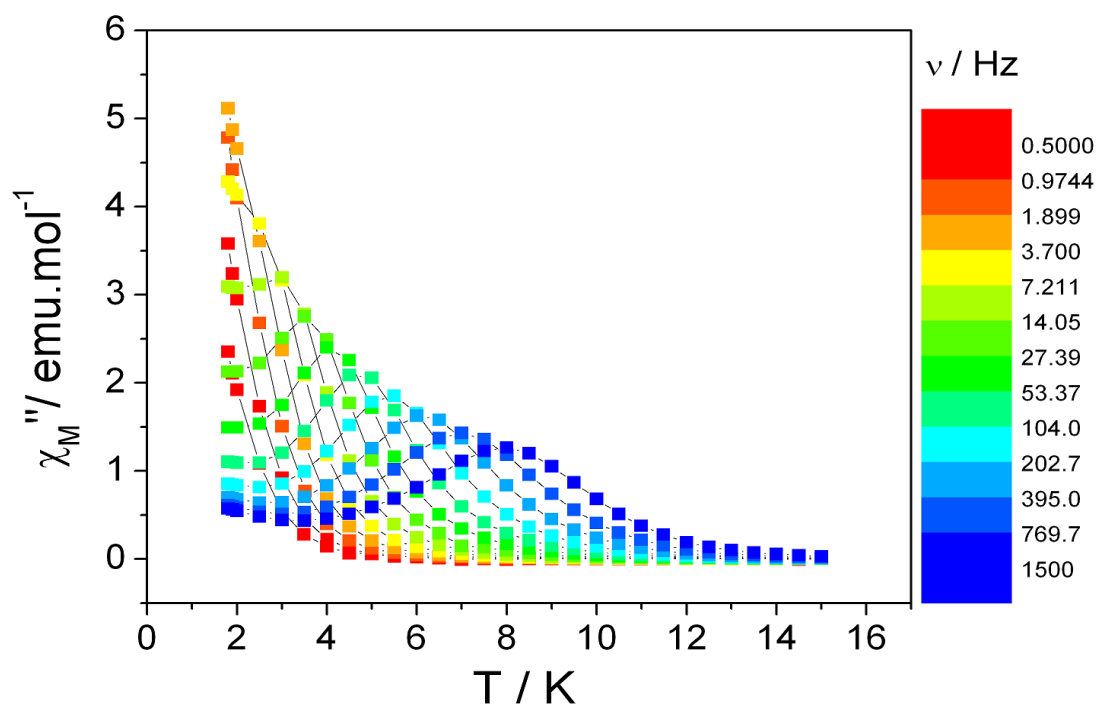

**Figure S16:** Temperature dependence of  $\chi_M''$  for **1** measured with 1000 Oe external dc field. Colour mapping ranges from 0.5 (red) to 1500 Hz (blue). Lines are guides to the eye.

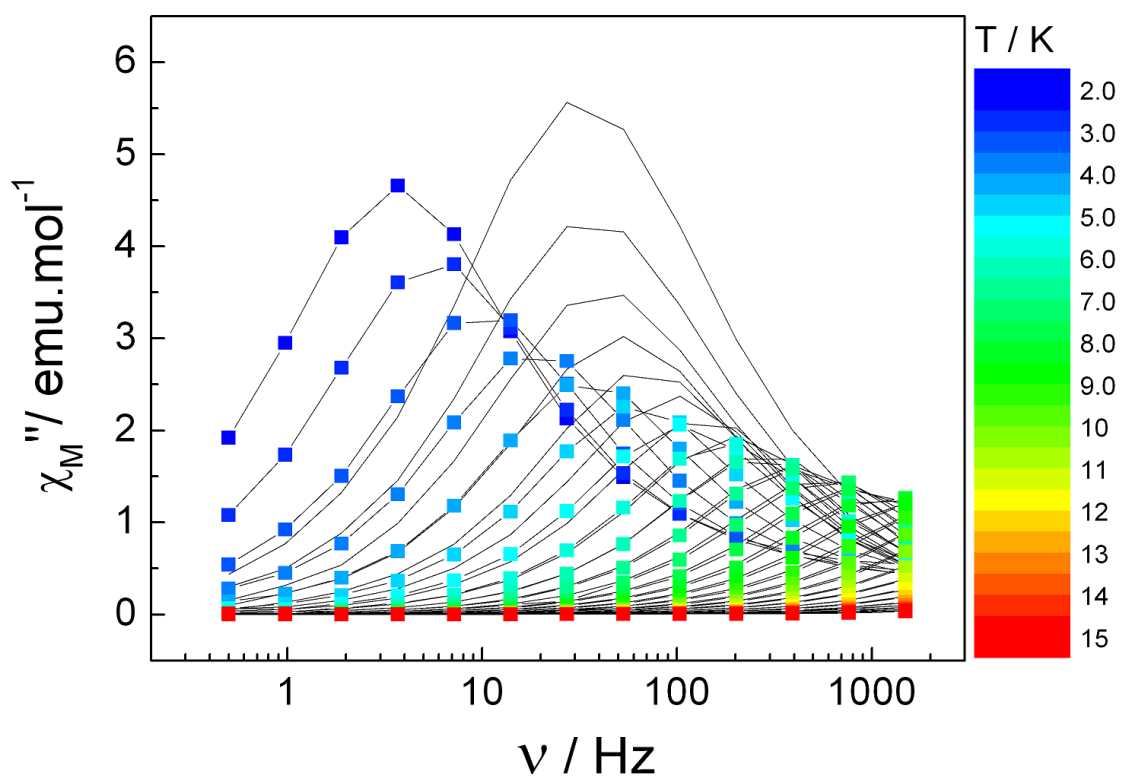

**Figure S17:** Comparison between the frequency dependence of  $\chi_M''$  for **1** with (lines + symbols) and without dc field (black lines).

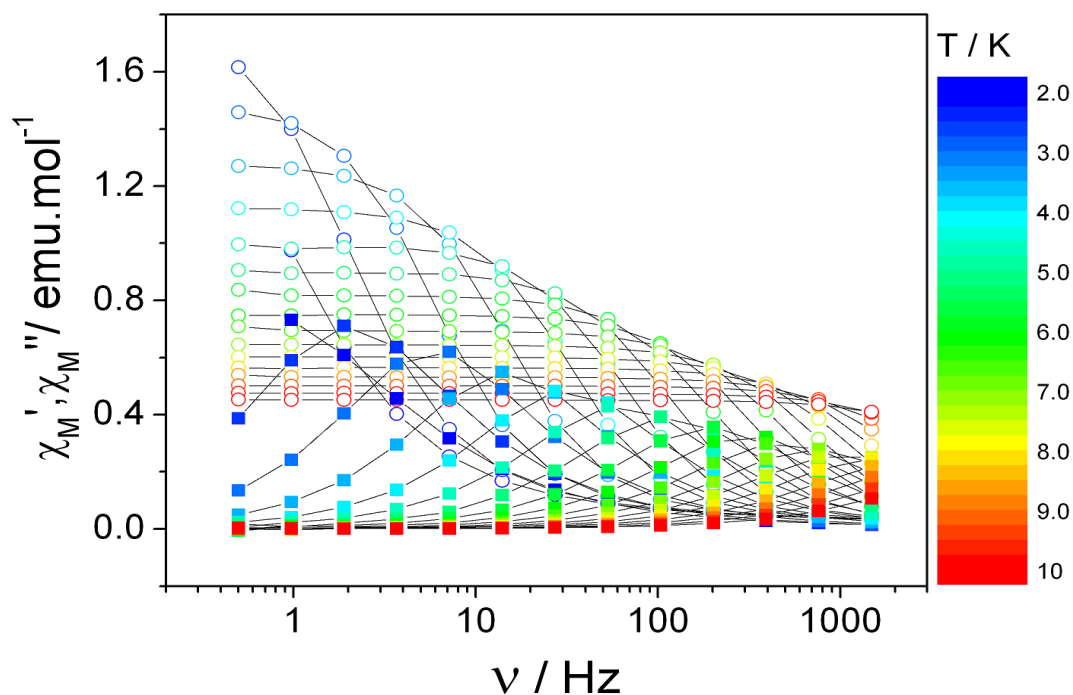

**Figure S18:** Frequency dependence of  $\chi_M'$  and  $\chi_M''$  for **2** measured with 1000 Oe external dc field. Colour mapping ranges from 2 (blue) to 15 K (red). Lines are guides to the eye.

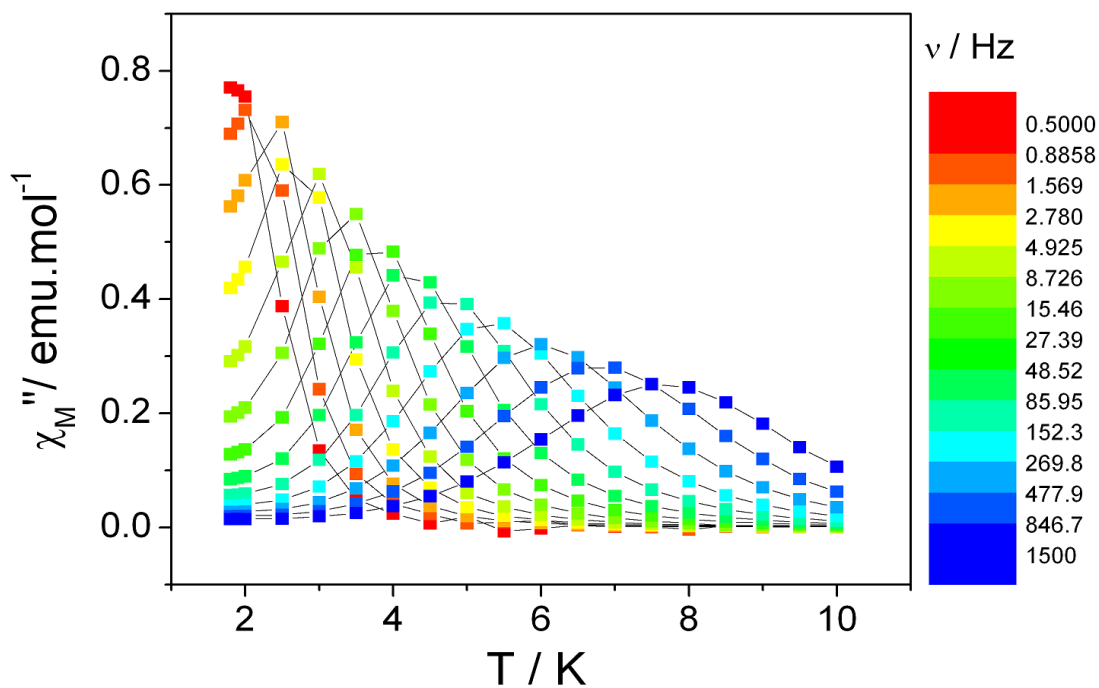

**Figure S19:** Temperature dependence of  $\chi_M''$  for **2** measured with 1000 Oe external dc field. Colour mapping ranges from 0.5 (red) to 1500 Hz (blue). Lines are guides to the eye.

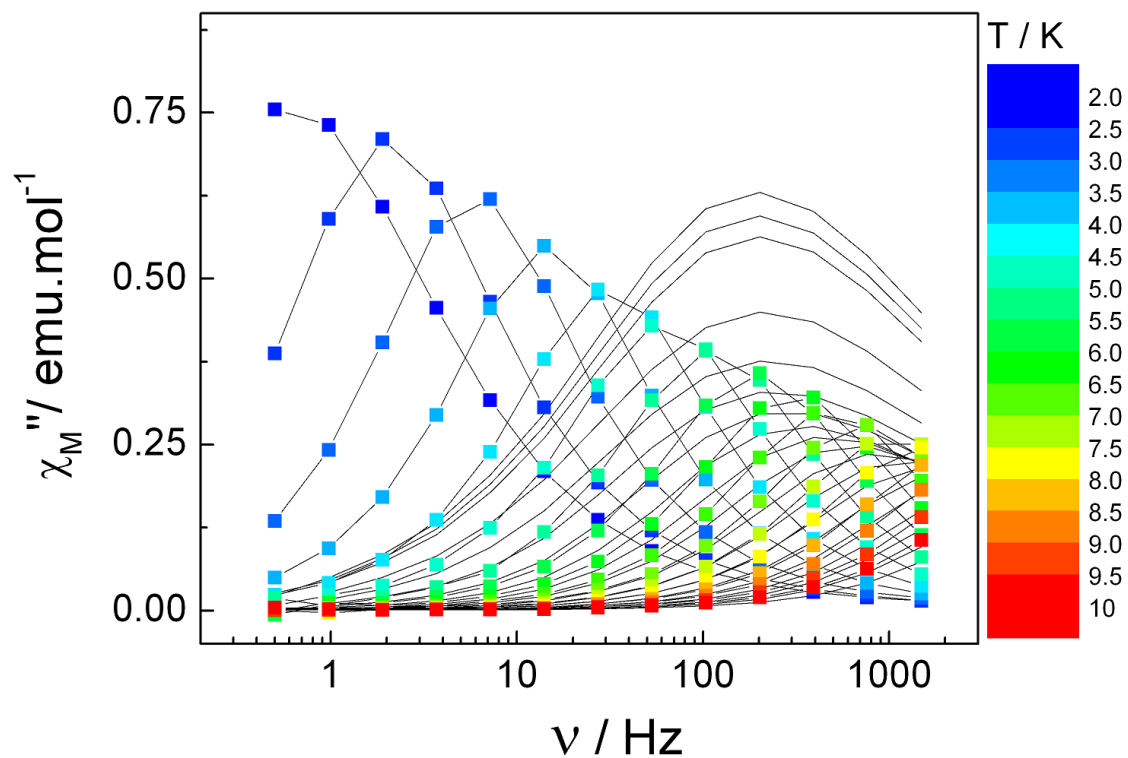

**Figure S20:** Comparison between the frequency dependence of  $\chi_M''$  for **2** with (lines + symbols) and without dc field (black lines).

**Table S8:** Table of  $\tau$  extracted values from the fitting of  $\chi''$  vs frequency curves for **1** in 1000 Oe dc field.

| T(K) | $\tau$ ( $\mu$ s) | T(K) | $\tau$ ( $\mu$ s) | T(K) | $\tau$ ( $\mu$ s) |
|------|-------------------|------|-------------------|------|-------------------|
| 2    | 42611             | 5    | 1475              | 8    | 87                |
| 2.5  | 26807             | 5.5  | 905               | 8.5  | 57                |
| 3    | 15152             | 6    | 387               | 9    | 37                |
| 3.5  | 8114              | 6.5  | 261               | 9.5  | 18                |
| 4    | 4392              | 7    | 184               | 10   | 12                |
| 4.5  | 2507              | 7.5  | 127               |      |                   |

**Table S9:** table of extracted values from the Argand plot of **1** with a 1000 Oe external field before normalization.

| T (K) | $\chi_s$              | $\chi_T$               | $\alpha$              | $\chi^2 (\times 10^{-5})$ |
|-------|-----------------------|------------------------|-----------------------|---------------------------|
| 2     | 2.776 ( $\pm 0.010$ ) | 14.883 ( $\pm 0.004$ ) | 0.167 ( $\pm 0.008$ ) | 1010                      |
| 2.5   | 2.327 ( $\pm 0.009$ ) | 12.063 ( $\pm 0.002$ ) | 0.150 ( $\pm 0.006$ ) | 353                       |
| 3     | 2.034 ( $\pm 0.011$ ) | 9.998 ( $\pm 0.007$ )  | 0.119 ( $\pm 0.004$ ) | 630                       |
| 3.5   | 1.618 ( $\pm 0.001$ ) | 8.502 ( $\pm 0.002$ )  | 0.123 ( $\pm 0.003$ ) | 573                       |
| 4     | 1.419 ( $\pm 0.003$ ) | 7.314 ( $\pm 0.007$ )  | 0.094 ( $\pm 0.003$ ) | 348                       |
| 4.5   | 1.203 ( $\pm 0.001$ ) | 6.434 ( $\pm 0.003$ )  | 0.099 ( $\pm 0.007$ ) | 221                       |
| 5     | 0.978 ( $\pm 0.002$ ) | 5.751 ( $\pm 0.001$ )  | 0.099 ( $\pm 0.001$ ) | 206                       |
| 5.5   | 0.901 ( $\pm 0.001$ ) | 5.194 ( $\pm 0.003$ )  | 0.097 ( $\pm 0.001$ ) | 122                       |
| 6     | 0.841 ( $\pm 0.005$ ) | 4.722 ( $\pm 0.009$ )  | 0.086 ( $\pm 0.004$ ) | 70                        |
| 6.5   | 0.770 ( $\pm 0.005$ ) | 4.333 ( $\pm 0.005$ )  | 0.082 ( $\pm 0.002$ ) | 130                       |
| 7     | 0.631 ( $\pm 0.002$ ) | 4.010 ( $\pm 0.003$ )  | 0.101 ( $\pm 0.001$ ) | 184                       |
| 7.5   | 0.463 ( $\pm 0.001$ ) | 3.728 ( $\pm 0.006$ )  | 0.121 ( $\pm 0.006$ ) | 190                       |
| 8     | 0.483 ( $\pm 0.002$ ) | 3.473 ( $\pm 0.002$ )  | 0.097 ( $\pm 0.006$ ) | 60                        |
| 8.5   | 0.372 ( $\pm 0.007$ ) | 3.087 ( $\pm 0.006$ )  | 0.103 ( $\pm 0.001$ ) | 40                        |
| 9     | 0.239 ( $\pm 0.001$ ) | 2.901 ( $\pm 0.009$ )  | 0.102 ( $\pm 0.002$ ) | 60                        |

**Table S10:** Table of  $\tau$  extracted values from the fitting of  $X''$  vs frequency curves for **2** in 1000 Oe dc field.

| T(K) | $\tau$ ( $\mu$ s) | T(K) | $\tau$ ( $\mu$ s) | T(K) | $\tau$ ( $\mu$ s) |
|------|-------------------|------|-------------------|------|-------------------|
| 2    | 211724            | 5    | 1389              | 8    | 104               |
| 2.5  | 74714             | 5.5  | 821               | 8.5  | 72                |
| 3    | 25852             | 6    | 511               | 9    | 48                |
| 3.5  | 10580             | 6.5  | 330               | 9.5  | 19                |
| 4    | 4911              | 7    | 220               | 10   | 8                 |
| 4.5  | 2537              | 7.5  | 150               |      |                   |

**Table S11:** table of extracted values from the Argand plot of **2** with a 1000 Oe external field before normalization.

| T (K) | $\chi_s$              | $\chi_T$              | $\alpha$              | $\chi^2 (\times 10^{-5})$ |
|-------|-----------------------|-----------------------|-----------------------|---------------------------|
| 2     | 0.032 ( $\pm 0.006$ ) | 2.533 ( $\pm 0.005$ ) | 0.288 ( $\pm 0.007$ ) | 400                       |
| 2.5   | 0.037 ( $\pm 0.001$ ) | 1.869 ( $\pm 0.006$ ) | 0.186 ( $\pm 0.006$ ) | 470                       |
| 3     | 0.035 ( $\pm 0.001$ ) | 1.508 ( $\pm 0.008$ ) | 0.121 ( $\pm 0.004$ ) | 410                       |
| 3.5   | 0.032 ( $\pm 0.003$ ) | 1.282 ( $\pm 0.008$ ) | 0.092 ( $\pm 0.002$ ) | 160                       |
| 4     | 0.030 ( $\pm 0.004$ ) | 1.125 ( $\pm 0.005$ ) | 0.081 ( $\pm 0.001$ ) | 30                        |
| 4.5   | 0.028 ( $\pm 0.002$ ) | 0.998 ( $\pm 0.006$ ) | 0.076 ( $\pm 0.007$ ) | 280                       |
| 5     | 0.028 ( $\pm 0.001$ ) | 0.898 ( $\pm 0.007$ ) | 0.063 ( $\pm 0.002$ ) | 90                        |
| 5.5   | 0.023 ( $\pm 0.002$ ) | 0.818 ( $\pm 0.006$ ) | 0.068 ( $\pm 0.003$ ) | 0.6                       |
| 6     | 0.024 ( $\pm 0.005$ ) | 0.750 ( $\pm 0.003$ ) | 0.068 ( $\pm 0.006$ ) | 70                        |
| 6.5   | 0.018 ( $\pm 0.008$ ) | 0.694 ( $\pm 0.001$ ) | 0.075 ( $\pm 0.009$ ) | 10                        |
| 7     | 0.017 ( $\pm 0.002$ ) | 0.645 ( $\pm 0.001$ ) | 0.072 ( $\pm 0.002$ ) | 0.1                       |
| 7.5   | 0.012 ( $\pm 0.001$ ) | 0.602 ( $\pm 0.002$ ) | 0.076 ( $\pm 0.009$ ) | 0.1                       |
| 8     | 0.023 ( $\pm 0.004$ ) | 0.561 ( $\pm 0.001$ ) | 0.058 ( $\pm 0.001$ ) | 10                        |

**Table S12:** Main extracted figures from the dynamic magnetic measurements on **1** and **2**

| H <sub>dc</sub> (Oe)    | 0               | 0               | 1000            | 1000            |
|-------------------------|-----------------|-----------------|-----------------|-----------------|
| Sample                  | Pure(1)         | Doped(2)        | 1               | 2               |
| $\tau_0$ ( $10^{-9}$ s) | 2.89 $\pm$ 0.02 | 3.40 $\pm$ 0.05 | 2.21 $\pm$ 0.08 | 2.92 $\pm$ 0.10 |
| $\Delta$ (K)            | 92 $\pm$ 1      | 85 $\pm$ 1      | 91 $\pm$ 1      | 84 $\pm$ 1      |
| $\tau_{(2K)}$ (Hz)      | 35              | 215             | 3               | 0.75            |
| $\alpha_{(2K)}$         | 0.21            | 0.37            | 0.18            | 0.30            |
| $\chi_s/\chi_T$ (2K)    | 0.09            | 0.10            | 0.17            | 0.01            |
| $\alpha_{(6.5K)}$       | 0.07            | 0.08            | 0.08            | 0.07            |
| $\chi_s/\chi_T$ (6.5K)  | 0.12            | 0.26            | 0.18            | 0.03            |

- [1] K. Bernot, L. Bogani, A. Caneschi, D. Gatteschi, R. Sessoli, *J. Am. Chem. Soc.* **2006**, *128*, 7947-7956.
- [2] A. Altomare, M. C. Burla, M. Camalli, G. L. Cascarano, C. Giacovazzo, A. Guagliardi, A. G. G. Moliterni, G. Polidori, R. Spagna, *J. Appl. Crystallogr.* **1999**, *32*, 115-119.
- [3] G. M. Sheldrick, T. R. Schneider, *Methods Enzymol.* **1997**, *277*, 319-343.
- [4] L. Farrugia, *J. Appl. Crystallogr.* **1999**, *32*, 837-838.
- [5] T. Roisnel, J. Rodriguez-Carvajal, in *Epdic 7: European Powder Diffraction, Pts 1 and 2, Vol. 378-3* (Eds.: R. Delhez, E. J. Mittemeijer), Trans Tech Publications Ltd, Zurich-Uetikon, **2001**, pp. 118-123; bW. Kraus, G. Nolze, *J. Appl. Crystallogr.* **1996**, *29*, 301-303.
